# Supplementary material
Source: PubMed Central journal article supplement (PMC5540816)

**Supplementary Figure 1.** Prevalence of clinical risk factors among premenopausal women in the National Health Interview Survey 2010 compared with premenopausal women in the Breast Cancer Surveillance Consortium (BCSC). Data were obtained from the 2010 NHIS Cancer Control Supplement, and included 7,662 women aged 40-74 years without breast cancer weighted to represent the broader population of U.S. women. *Family history* refers to first-degree family history; *History of breast biopsy* includes benign breast biopsy only.

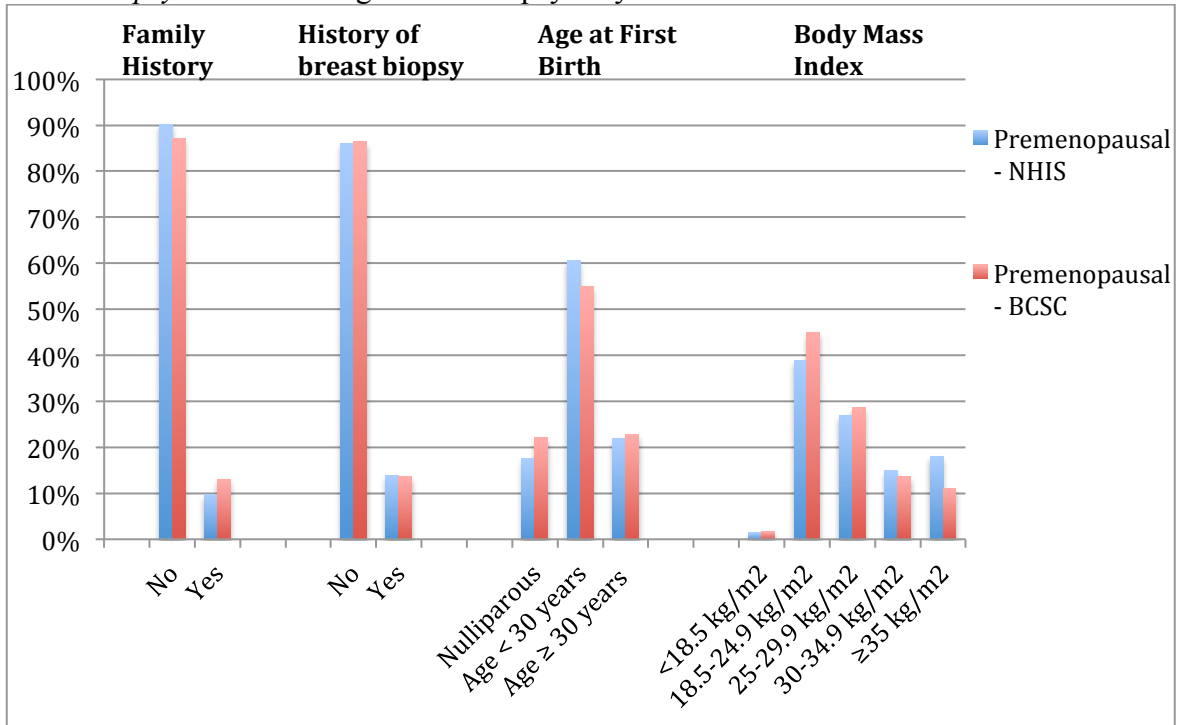

**Supplementary Figure 2.** Prevalence of clinical risk factors among postmenopausal women in the National Health Interview Survey 2010 compared with postmenopausal women in the Breast Cancer Surveillance Consortium (BCSC). Data were obtained from the 2010 NHIS Cancer Control Supplement, and included 7,662 women aged 40-74 years without breast cancer weighted to represent the broader population of U.S. women. *Family history* refers to first-degree family history; *History of breast biopsy* includes benign breast biopsy only.

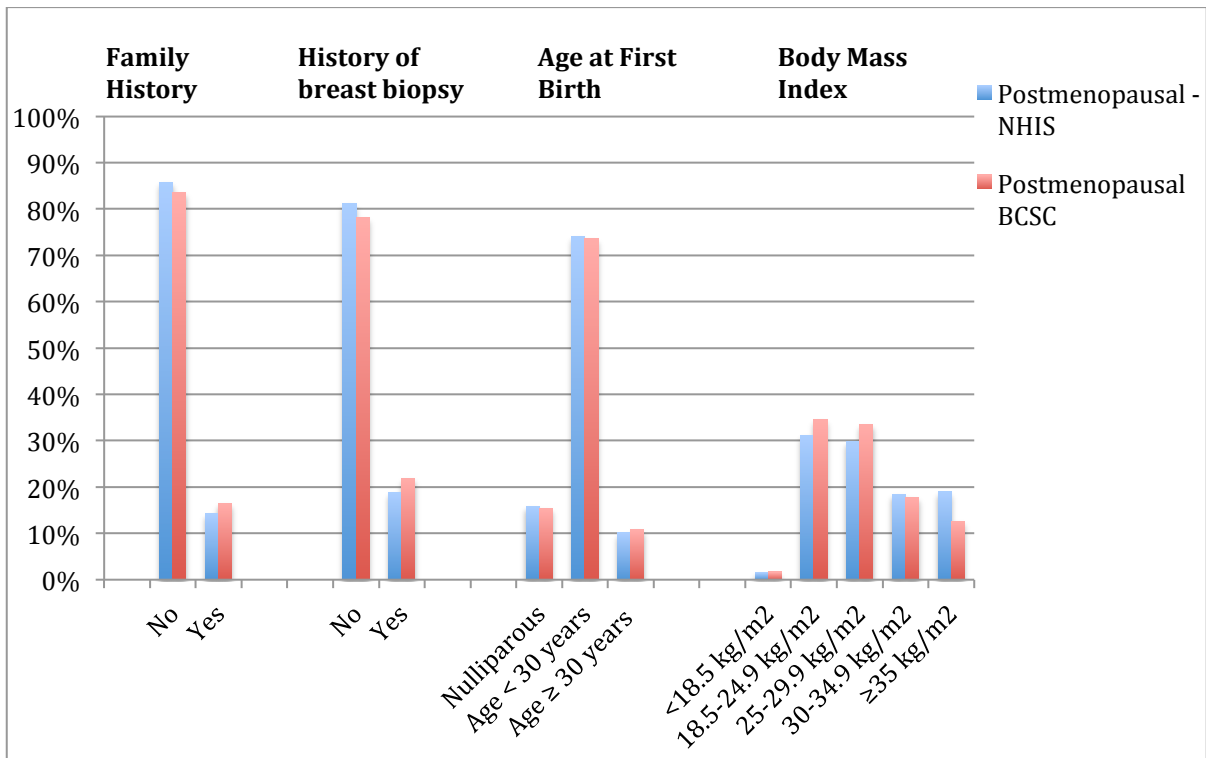

Supplement: NIHMS848910-supplement-Supplemental_Figures.pdf [file NIHMS848910-supplement-Supplemental_Figures.pdf]
